# Supplementary material
Source: Springer Nature journal article supplement (https://www.springermedizin.de/resource/supplementary/12865_2013_546_MOESM3_ESM.pdf/9428182)

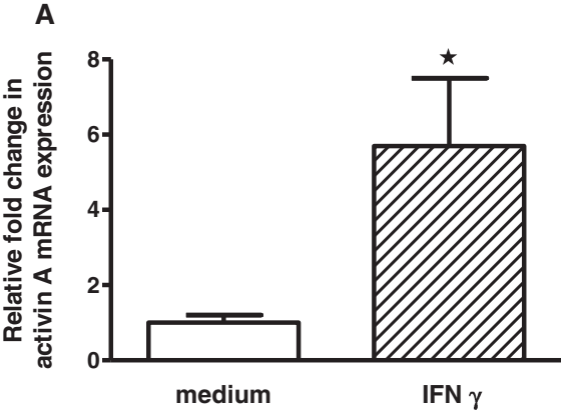

★  $p = 0.007$ ,  $n=4$

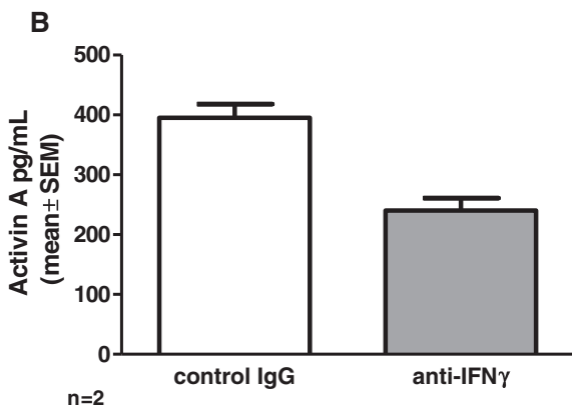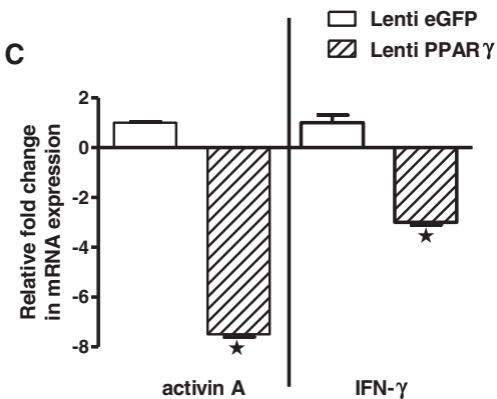

★  $p < 0.01$ ,  $n=5$

Supplement: MOESM3 [file 9428182]
